# Supplementary material for: Daily monitoring of vaginal interleukin 6 as a predictor of intraamniotic inflammation after preterm premature rupture of membranes – a new method of sampling studied in a prospective multicenter trial
Source: publisher site journal article supplement (doi:10.1515/jpm-2020-0406), 2021-02-24
Supplement: Supplementary file 2 [file j_jpm-2020-0406_suppl_002.docx]

**Supplemental Table 1**

**Allocation criteria** **inflammation-group** single or in combination in % (n)

| % (n) | **single** | **with HCA** | **with FIRS** | **with EONS** |
| --- | --- | --- | --- | --- |
| **HCA (14)** | 50 (7) | **100** (14) | 50 (7) | 35 (5) |
| **FIRS (11)** | 36 (4) | 63 (7) | **100** (11) | 45 (5) |
| **EONS (7)** | 29 (2) | 71 (5) | 71 (5) | **100** (7) |

HCA = Histological chorioamnionitis, FIRS = fetal inflammatory response syndrome, EONS = early onset neonatal sepsis
