# Supplementary material for: Daily monitoring of vaginal interleukin 6 as a predictor of intraamniotic inflammation after preterm premature rupture of membranes – a new method of sampling studied in a prospective multicenter trial
Source: publisher site journal article supplement (doi:10.1515/jpm-2020-0406), 2021-02-24
Supplement: Supplementary file 3 [file j_jpm-2020-0406_suppl_003.docx]

**Supplemental Table 2** **Neonatal outcome** of inflammation and control group (median or % (n) )

| Parameter | **Control**  (n=17) | **Inflammation** **group**  (n=20) | p-value |
| --- | --- | --- | --- |
| Birth weight, gram | 1892 | 1490 | 0.05 |
| Female sex | 24 % (4) | 65 % (13) | 0.01* |
| Arterial cord blood pH | 7.33 | 7.35 | 0.54 |
| LONS | 6 % (1) | 5 % (1) | 0.90 |
| IVH grade 1-2 | 23 % (4) | 10 % (2) | 0.27 |
| IVH grade 3-4 | 0 % (0) | 5 % (1) | 0.35 |
| RDS | 52 % (9) | 65 % (13) | 0.46 |
| NEC | 0 % (0) | 0 % (0) | n. d. |
| BPD | 12 % (2) | 10 % (2) | 0.86 |
| PDA | 6 % (1) | 10 % (2) | 0.65 |
| Non life-threatening malformations | 12 % (2) | 25 % (5) | 0.30 |
| Neonatal mortality | 0 % (0) | 0 % (0) | n. d. |
| NICU treatment, days | 11 | 16 | 0.05 |
| Intubation, days | 0 (range 0 - 1) | 0 (range 0 - 12) | 0.03 |
| CPAP, days | 1.5 (range 0 - 14) | 4 (range 0 - 75) | 0.10 |
| Antibiotic treatment, days | 0 | 5 | <0.01 |

LONS – late onset neonatal sepsis; IVH – intraventricular hemorrhage; RDS – respiratory distress syndrome; NEC – necrotizing enterocolitis; BPD – bronchopulmonary dysplasia; NICU – neonatal intensive care unit; PDA – persistent ductus arteriosus; CPAP – continuous positive airway pressure
