# Supplementary figures and images for: Daily monitoring of vaginal interleukin 6 as a predictor of intraamniotic inflammation after preterm premature rupture of membranes – a new method of sampling studied in a prospective multicenter trial
Source: publisher site journal article supplement (doi:10.1515/jpm-2020-0406), 2021-02-24

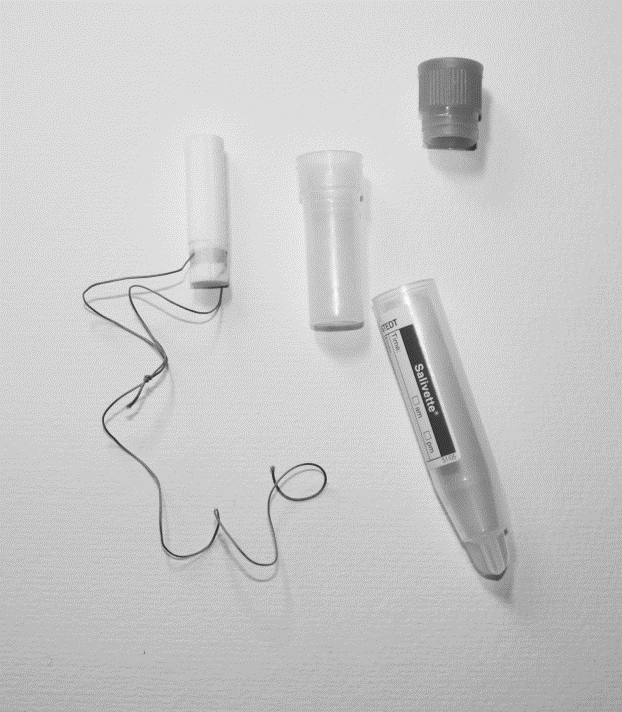


**0 100mm**

**Supplemental Figure 1**

**Vaginal fluid sampling kit**

Supplement: Supplementary file 1 [file j_jpm-2020-0406_suppl_001.docx]
